# Supplementary material for: MiRNA-205-5p Promotes Development of Hepatocellular Carcinoma Via Targeting DLC1
Source: Research Square preprint supplement (doi:10.21203/rs.3.rs-2327343/v1), 2022-12-15
Supplement: Supplementary file 1 [file PCR-A.xlsx]

## Sheet: Sheet1
Normal	19.06	22.67	3.61	0	1	0.908448	1.10078
	19.02	22.74	3.72	0.11	0.926588		1.01997
	18.76	22.38	3.62	0.01	0.993092		1.09317
	18.93	22.9	3.97	0.36	0.779165		0.857688
	18.87	22.46	3.59	-0.02	1.01396		1.11614
	18.73	22.38	3.65	0.04	0.972655		1.07068
	19	22.93	3.93	0.32	0.80107		0.8818
	18.77	22.5	3.73	0.12	0.920188		1.01292
	18.73	22.47	3.74	0.13	0.913831		1.00593
	18.87	22.63	3.76	0.15	0.90125		0.992077
	19.14	22.72	3.58	-0.03	1.02101		1.12391
	19.06	22.68	3.62	0.01	0.993092		1.09317
	18.98	22.98	4	0.39	0.76313		0.840037
	18.87	22.86	3.99	0.38	0.768438		0.84588
	18.69	22.45	3.76	0.15	0.90125		0.992077
	19.15	22.85	3.7	0.09	0.939523		1.03421
	18.65	22.22	3.57	-0.04	1.02811		1.13173
	19.12	23	3.88	0.27	0.82932		0.912897
	19.11	23.06	3.95	0.34	0.790041		0.86966
	19.03	22.79	3.76	0.15	0.90125		0.992077
	19.05	22.72	3.67	0.06	0.959264		1.05594
	18.98	22.6	3.62	0.01	0.993092		1.09317
	18.64	22.39	3.75	0.14	0.907519		0.998978
	19.19	23.17	3.98	0.37	0.773782		0.851763
	19.04	22.89	3.85	0.24	0.846745		0.932079
	18.98	22.68	3.7	0.09	0.939523		1.03421
	18.74	22.43	3.69	0.08	0.946058		1.0414
	19.16	22.84	3.68	0.07	0.952638		1.04864
	18.95	22.75	3.8	0.19	0.876606		0.964949
	19.03	22.79	3.76	0.15	0.90125		0.992077
Cancer	18.92	21.94	3.02	-0.59	1.50525		1.65694
	18.93	21.91	2.98	-0.63	1.54756		1.70353
	18.99	22.11	3.12	-0.49	1.40444		1.54598
	19.08	22.11	3.03	-0.58	1.49485		1.6455
	18.67	21.79	3.12	-0.49	1.40444		1.54598
	19.15	22.33	3.18	-0.43	1.34723		1.48301
	18.93	22.1	3.17	-0.44	1.3566		1.49332
	19.01	22.05	3.04	-0.57	1.48452		1.63413
	19.2	22.19	2.99	-0.62	1.53688		1.69176
	18.96	22.11	3.15	-0.46	1.37554		1.51417
	18.91	21.9	2.99	-0.62	1.53688		1.69176
	19	22.07	3.07	-0.54	1.45397		1.6005
	19.05	22.18	3.13	-0.48	1.39474		1.5353
	18.97	22.15	3.18	-0.43	1.34723		1.48301
	18.77	21.9	3.13	-0.48	1.39474		1.5353
	19.02	22.21	3.19	-0.42	1.33793		1.47276
	19.2	22.39	3.19	-0.42	1.33793		1.47276
	19	22	3	-0.61	1.52626		1.68007
	19.02	21.99	2.97	-0.64	1.55833		1.71538
	18.73	21.84	3.11	-0.5	1.41421		1.55674
	18.83	21.98	3.15	-0.46	1.37554		1.51417
	18.98	22.16	3.18	-0.43	1.34723		1.48301
	18.77	21.87	3.1	-0.51	1.42405		1.56756
	19.11	22.21	3.1	-0.51	1.42405		1.56756
	18.78	21.9	3.12	-0.49	1.40444		1.54598
	18.98	22.01	3.03	-0.58	1.49485		1.6455
	18.93	22.06	3.13	-0.48	1.39474		1.5353
	18.89	21.87	2.98	-0.63	1.54756		1.70353
	18.94	22.07	3.13	-0.48	1.39474		1.5353
	18.93	21.97	3.04	-0.57	1.48452		1.63413
