# Supplementary material for: MiRNA-205-5p Promotes Development of Hepatocellular Carcinoma Via Targeting DLC1
Source: Research Square preprint supplement (doi:10.21203/rs.3.rs-2327343/v1), 2022-12-15
Supplement: Supplementary file 2 [file PCR-B.xlsx]

## Sheet: Sheet1
	GAPDH
THLE2	18.92	22.36	3.44	0	1	0.932898	1.07193
	18.76	22.28	3.52	0.08	0.946058		1.01411
	19.11	22.78	3.67	0.23	0.852635		0.913964
HuH-7	19.03	21.32	2.29	-1.15	2.21914		2.37876
	19.12	21.55	2.43	-1.01	2.01391		2.15877
	19.18	21.44	2.26	-1.18	2.26577		2.42874
HepG2	18.82	20.65	1.83	-1.61	3.05252		3.27208
	19.09	21.05	1.96	-1.48	2.78949		2.99013
	19.11	20.99	1.88	-1.56	2.94854		3.16062
HCCLM3	18.99	22.22	3.23	-0.21	1.15669		1.23989
	18.84	22.33	3.49	0.05	0.965936		1.03541
	18.99	22.23	3.24	-0.2	1.1487		1.23132
SK-Hep-1	18.86	21.93	3.07	-0.37	1.29235		1.38531
	18.94	22.11	3.17	-0.27	1.20581		1.29254
	18.98	22.16	3.18	-0.26	1.19748		1.28361
