# Supplementary material for: MiRNA-205-5p Promotes Development of Hepatocellular Carcinoma Via Targeting DLC1
Source: Research Square preprint supplement (doi:10.21203/rs.3.rs-2327343/v1), 2022-12-15
Supplement: Supplementary file 3 [file CCK-8.xlsx]

## Sheet: Sheet1
HUH-7					HepG2
原始数据	空白	NC inhibitor	miR-205-5p inhibitor		原始数据	空白	NC inhibitor	miR-205-5p inhibitor
0h	0.21	0.314	0.311		0h	0.208	0.316	0.323
	0.205	0.323	0.305			0.2	0.304	0.317
	0.218	0.319	0.319			0.244	0.314	0.309
24h	0.228	0.747	0.577		24h	0.206	0.714	0.583
	0.202	0.699	0.63			0.228	0.769	0.636
	0.223	0.789	0.664			0.242	0.702	0.67
48h	0.24	0.832	0.703		48h	0.212	0.807	0.702
	0.237	0.868	0.758			0.209	0.84	0.757
	0.21	0.919	0.82			0.233	0.901	0.802
72h	0.233	1.053	0.921		72h	0.2	1.002	0.942
	0.211	1.094	0.962			0.217	1.055	0.98
	0.232	1.002	0.871			0.249	1.092	0.893
	分析数据	NC inhibitor	miR-205-5p inhibitor			分析数据	NC inhibitor	miR-205-5p inhibitor
	0h	0.104	0.101			0h	0.108	0.115
		0.118	0.1				0.104	0.117
		0.101	0.101				0.07	0.065
	24h	0.519	0.349			24h	0.508	0.377
		0.497	0.428				0.541	0.408
		0.566	0.441				0.46	0.428
	48h	0.592	0.463			48h	0.595	0.49
		0.631	0.521				0.631	0.548
		0.709	0.61				0.668	0.569
	72h	0.82	0.688			72h	0.802	0.742
		0.883	0.751				0.838	0.763
		0.77	0.639				0.843	0.644
			0.0459333					0.0457627
