# Supplementary material for: MiRNA-205-5p Promotes Development of Hepatocellular Carcinoma Via Targeting DLC1
Source: Research Square preprint supplement (doi:10.21203/rs.3.rs-2327343/v1), 2022-12-15
Supplement: Supplementary file 4 [file EdU.xlsx]

## Sheet: Sheet1
HepG2	NC inhibitor	miR-205-5p inhibitor			HUH-7	NC inhibitor	miR-205-5p inhibitor
DAPI	41	36			DAPI	44	33
	47	42				41	29
	32	47				35	44
Edu	20	10			Edu	17	10
	20	13				20	10
	19	10				19	11
	48.7805	27.7778				38.6364	30.303
	42.5532	30.9524				48.7805	34.4828
	59.375	21.2766				54.2857	25
		0.0142383					0.0316844
