# Supplementary material for: MiRNA-205-5p Promotes Development of Hepatocellular Carcinoma Via Targeting DLC1
Source: Research Square preprint supplement (doi:10.21203/rs.3.rs-2327343/v1), 2022-12-15
Supplement: Supplementary file 5 [file .xlsx]

## Sheet: Sheet1
原始数据	NC inhibitor	miR-205-5p inhibitor
HuH-7	5.87	25.1
	4.95	27.11
	3.25	23.75
		7.68798e-05
