# Supplementary material for: MiRNA-205-5p Promotes Development of Hepatocellular Carcinoma Via Targeting DLC1
Source: Research Square preprint supplement (doi:10.21203/rs.3.rs-2327343/v1), 2022-12-15
Supplement: Supplementary file 6 [file .xlsx]

## Sheet: Sheet1
原始数据	NC inhibitor	miR-205-5p inhibitor
HepG2	5	24.26
	4.05	25.79
	5.97	27.54
		4.52097e-05
