# Supplementary material for: MiRNA-205-5p Promotes Development of Hepatocellular Carcinoma Via Targeting DLC1
Source: Research Square preprint supplement (doi:10.21203/rs.3.rs-2327343/v1), 2022-12-15
Supplement: Supplementary file 7 [file Ҷֵ.xlsx]

## Sheet: Sheet1
	NC inhibitor	miR-205-5p inhibitor
Bax	53125	156212		0.224962	0.705026		0.840674	2.63466
	55945	160141		0.277789	0.759351		1.03809	2.83766
	63215	163895		0.300041	0.811373		1.12124	3.03207
				0.267597
Bcl-2	201612	35412		0.853742	0.159824		0.823983	0.154253
	223154	50123		1.10805	0.237671		1.06942	0.229387
	241566	42450		1.14656	0.210152		1.10659	0.202826
				1.03612
Cleaved-caspase-3	35212	145163		0.149108	0.655159		0.794914	3.49274
	40125	150312		0.199236	0.712744		1.06215	3.79973
	45169	152230		0.214388	0.753625		1.14293	4.01767
				0.187577
β-actin	236151	221569
	201394	210892
	210688	201997
