# Supplementary material for: MiRNA-205-5p Promotes Development of Hepatocellular Carcinoma Via Targeting DLC1
Source: Research Square preprint supplement (doi:10.21203/rs.3.rs-2327343/v1), 2022-12-15
Supplement: Supplementary file 8 [file Ҷֵ.xlsx]

## Sheet: Sheet1
	NC inhibitor	miR-205-5p inhibitor
Bax	42102	135261		0.310459	0.964524		1.0796	3.35405
	40996	140561		0.287568	0.988759		0.999993	3.43832
	38546	132106		0.264683	0.911686		0.920411	3.17031
				0.28757
Bcl-2	149151	55121		1.09984	0.393059		1.09973	0.393022
	140248	40244		0.983775	0.283091		0.983682	0.283065
	133496	40594		0.916673	0.280146		0.916586	0.280119
				1.00009
cleaved-caspase-3	39644	145151		0.292334	1.03505		1.08968	3.85815
	38541	142364		0.270347	1.00144		1.00772	3.73288
	35264	140307		0.242146	0.968282		0.902602	3.60928
				0.268276
actin	135612	140236
	142561	142159
	145631	144903
