# Supplementary material for: MiRNA-205-5p Promotes Development of Hepatocellular Carcinoma Via Targeting DLC1
Source: Research Square preprint supplement (doi:10.21203/rs.3.rs-2327343/v1), 2022-12-15
Supplement: Supplementary file 9 [file .xls]

## Sheet: Sheet1
HUH-7	NC inhibitor	miR-205-5p inhibitor		HepG2	NC inhibitor	miR-205-5p inhibitor
0h	2436.02	2640.18		0h	2122.02	2370.27
	2767.24	2559.01			2214.03	2136.41
	2425.91	2697.03			2328.15	2250
48h	660.056	1427.01		48h	674.006	1356.4
	609.001	1536			564.037	1179.64
	796.054	1322.01			501.047	1119.14
	1775.97	1213.16			1448.01	1013.87
	2158.24	1023			1650	956.768
	1629.85	1375.02			1827.1	1130.86
	72.9043	45.9501			68.2375	42.7745
	77.9925	39.9766			74.5245	44.7839
	67.1853	50.9829			78.4787	50.2603
		0.00371852				0.00172553
