# Supplementary material for: MiRNA-205-5p Promotes Development of Hepatocellular Carcinoma Via Targeting DLC1
Source: Research Square preprint supplement (doi:10.21203/rs.3.rs-2327343/v1), 2022-12-15
Supplement: Supplementary file 10 [file transwell.xlsx]

## Sheet: Sheet1
原始数据	NC inhibitor	miR-205-5p inhibitor
HepG2	174	45
	162	57
	152	66		0.000265804
HuU-7	131	39
	147	49
	155	58		0.00043174
