# Supplementary material for: MiRNA-205-5p Promotes Development of Hepatocellular Carcinoma Via Targeting DLC1
Source: Research Square preprint supplement (doi:10.21203/rs.3.rs-2327343/v1), 2022-12-15
Supplement: Supplementary file 11 [file transwell.xlsx]

## Sheet: Sheet1
原始数据	NC inhibitor	miR-205-5p inhibitor
HepG2	168	34
	155	46
	141	55		0.00037597
HuU-7	104	21
	113	32
	125	41		0.000596008
