# Supplementary material for: MiRNA-205-5p Promotes Development of Hepatocellular Carcinoma Via Targeting DLC1
Source: Research Square preprint supplement (doi:10.21203/rs.3.rs-2327343/v1), 2022-12-15
Supplement: Supplementary file 12 [file ˫ӫø.xlsx]

## Sheet: Sheet1
HuH-7	DLC1-WT/NC mimic				DLC1-WT/miR-205-5p mimic				DLC1-Mut/NC mimic				DLC1-Mut/miR-205-5p mimic
LUC
1	281316	290319	278280		145241	120312	102451		291624	274849	300691		288019	280564	283893
2	291030	294609	289685		56325	95121	96644		293261	282307	289526		278030	298735	297466
3	299006	302953	290406		103525	123365	95247		279475	276383	297359		290141	286337	298643
Rluc
1	250875	265231	251105		257620	253547	272846		247753	251859	244907		261615	254894	252644
2	265012	244564	255357		266455	264102	268714		264087	260963	244045		256989	265712	273446
3	270048	241972	239350		257942	258181	261341		272986	257010	271709		260792	253476	235400
luc/Rluc				Average
DLC1-WT/NC mimic	1.12134	1.09459	1.10822	1.10805
	1.09818	1.20463	1.13443	1.14575
	1.10723	1.25202	1.21331	1.19085
DLC1-WT/miR-205-5p mimic	0.56378	0.474516	0.37549	0.471262
	0.211387	0.360168	0.359654	0.310403
	0.40135	0.477824	0.364455	0.414543
DLC1-Mut/NC mimic	1.17708	1.09128	1.22778	1.16538
	1.11047	1.08179	1.18636	1.12621
	1.02377	1.07538	1.0944	1.06452
DLC1-Mut/miR-205-5p mimic	1.10093	1.10071	1.12369	1.10844
	1.08188	1.12428	1.08784	1.098
	1.11254	1.12964	1.26866	1.17028
DLC1-WT/NC mimic	1.01199	0.987852	1.00015	1
	0.991089	1.08716	1.02381	1.03402
	0.999262	1.12993	1.095	1.07473
DLC1-WT/miR-205-5p mimic	0.508804	0.428244	0.338875	0.425307
	0.190773	0.325046	0.324583	0.280134
	0.362213	0.431229	0.328916	0.374119
DLC1-Mut/NC mimic	1.01004	0.936419	1.05354	1
	0.952885	0.928273	1.01801	0.966389
	0.878488	0.922772	0.939097	0.913452
DLC1-Mut/miR-205-5p mimic	0.944695	0.944508	0.964226	0.951143
	0.928347	0.964735	0.933467	0.942183
	0.954658	0.969335	1.08863	1.00421
HepG2
	DLC1-WT/NC mimic				DLC1-WT/miR-205-5p mimic				DLC1-Mut/NC mimic				DLC1-Mut/miR-205-5p mimic
LUC
1	271255	268090	278353		85151	92121	103212		292523	285492	270887		287208	275301	282075
2	289387	273624	269055		90154	106324	108745		272374	291471	266797		295080	271409	285449
3	292007	279020	278128		88516	85495	105216		276646	271517	286932		273489	271839	271581
Rluc
1	247991	243721	236746		239349	247879	255294		232889	242324	226736		253246	233354	227742
2	233610	227827	233588		234097	238495	230377		244223	254629	231945		226814	249756	241862
3	238642	235846	228479		248540	250918	240926		240444	236393	238786		243400	240230	246718
luc/Rluc				Average
DLC1-WT/NC mimic	1.09381	1.09999	1.17575	1.12318
	1.23876	1.20102	1.15184	1.1972
	1.22362	1.18306	1.2173	1.20799
DLC1-WT/miR-205-5p mimic	0.355761	0.371637	0.404287	0.377228
	0.385114	0.445812	0.472031	0.434319
	0.356144	0.340729	0.436715	0.377863
DLC1-Mut/NC mimic	1.25606	1.17814	1.19472	1.20964
	1.11527	1.14469	1.15026	1.13674
	1.15056	1.14858	1.20163	1.16692
DLC1-Mut/miR-205-5p mimic	1.13411	1.17976	1.23857	1.18415
	1.30098	1.0867	1.18021	1.1893
	1.12362	1.13158	1.10077	1.11866
DLC1-WT/NC mimic	0.97385	0.97935	1.0468	1
	1.1029	1.0693	1.02551	1.06591
	1.08942	1.05331	1.0838	1.07551
DLC1-WT/miR-205-5p mimic	0.316744	0.330879	0.359948	0.335857
	0.342878	0.396919	0.420262	0.386687
	0.317085	0.303361	0.38882	0.336422
DLC1-Mut/NC mimic	1.03837	0.973958	0.987667	1
	0.921981	0.946303	0.950908	0.939731
	0.951159	0.949522	0.993374	0.964685
DLC1-Mut/miR-205-5p mimic	0.937555	0.975293	1.02392	0.978921
	1.07551	0.898361	0.975672	0.98318
	0.928885	0.935464	0.91	0.924783
