# Supplementary material for: MiRNA-205-5p Promotes Development of Hepatocellular Carcinoma Via Targeting DLC1
Source: Research Square preprint supplement (doi:10.21203/rs.3.rs-2327343/v1), 2022-12-15
Supplement: Supplementary file 13 [file PCR.xlsx]

## Sheet: Sheet1
Hun-7
NC inhibitor	18.56	22.16	3.6	0	1	0.974703	1.02595
	19.05	22.82	3.77	0.17	0.888843		0.911912
	18.79	22.34	3.55	-0.05	1.03526		1.06213
miR-205-5p inhibitor	18.86	21.22	2.36	-1.24	2.36199		2.42329
	18.32	20.63	2.31	-1.29	2.44528		2.50875
	18.64	20.92	2.28	-1.32	2.49666		2.56146
HepG2
NC inhibitor	18.96	21.32	2.36	0	1	0.943491	1.05989
	18.75	21.32	2.57	0.21	0.864537		0.916317
	18.65	21.06	2.41	0.05	0.965936		1.02379
miR-205-5p inhibitor	19.23	21.14	1.91	-0.45	1.36604		1.44786
	19.45	21.15	1.7	-0.66	1.58008		1.67472
	19.3	21.12	1.82	-0.54	1.45397		1.54106
