# Supplementary material for: MiRNA-205-5p Promotes Development of Hepatocellular Carcinoma Via Targeting DLC1
Source: Research Square preprint supplement (doi:10.21203/rs.3.rs-2327343/v1), 2022-12-15
Supplement: Supplementary file 14 [file Ҷֵ.xlsx]

## Sheet: Sheet1
	NC inhibitor	miR-205-5p inhibitor
DLC1	56122	165215		0.285592	0.844524		0.915202	2.70634
	60841	175489		0.315821	0.922083		1.01207	2.95489
	63487	182160		0.334748	0.971748		1.07273	3.11404
				0.312054
β-actin	196511	195631
	192644	190318
	189656	187456
