# Supplementary material for: MiRNA-205-5p Promotes Development of Hepatocellular Carcinoma Via Targeting DLC1
Source: Research Square preprint supplement (doi:10.21203/rs.3.rs-2327343/v1), 2022-12-15
Supplement: Supplementary file 15 [file Ҷֵ.xlsx]

## Sheet: Sheet1
	NC inhibitor	miR-205-5p inhibitor
DLC1	42115	145923		0.288627	0.972004		0.89336	3.00855
	45199	153268		0.321596	1.03238		0.995405	3.19543
	50395	155047		0.359018	1.06735		1.11123	3.30366
				0.32308
β-actin	145915	150126
	140546	148461
	140369	145264
