# Supplementary material for: MiRNA-205-5p Promotes Development of Hepatocellular Carcinoma Via Targeting DLC1
Source: Research Square preprint supplement (doi:10.21203/rs.3.rs-2327343/v1), 2022-12-15
Supplement: Supplementary file 16 [file CCK-8.xlsx]

## Sheet: Sheet1
HUH-7						HepG2
原始数据	空白	NC inhibitor+sh-NC	miR-205-5p inhibitor+sh-NC	miR-205-5p inhibitor+sh-DLC1		原始数据	空白	NC inhibitor+sh-NC	miR-205-5p inhibitor+sh-NC	miR-205-5p inhibitor+sh-DLC1
0h	0.245	0.306	0.3	0.31		0h	0.277	0.307	0.315	0.303
	0.222	0.314	0.301	0.317			0.26	0.311	0.304	0.312
	0.244	0.318	0.314	0.303			0.264	0.306	0.313	0.316
24h	0.214	0.666	0.421	0.545		24h	0.206	0.691	0.446	0.559
	0.264	0.693	0.466	0.586			0.179	0.718	0.491	0.6
	0.208	0.751	0.535	0.663			0.261	0.776	0.56	0.677
48h	0.221	0.822	0.602	0.767		48h	0.204	0.814	0.591	0.748
	0.239	0.934	0.676	0.741			0.241	0.926	0.655	0.722
	0.273	0.921	0.755	0.842			0.231	0.913	0.684	0.823
72h	0.273	1.099	0.791	0.974		72h	0.199	1.124	0.816	0.988
	0.232	1.132	0.849	0.985			0.262	1.157	0.874	0.999
	0.182	1.058	0.756	0.989			0.279	1.083	0.781	1.003
	分析数据	NC inhibitor+sh-NC	miR-205-5p inhibitor+sh-NC	miR-205-5p inhibitor+sh-DLC1			分析数据	NC inhibitor+sh-NC	miR-205-5p inhibitor+sh-NC	miR-205-5p inhibitor+sh-DLC1
	0h	0.061	0.055	0.065			0h	0.03	0.038	0.026
		0.092	0.079	0.095				0.051	0.044	0.052
		0.074	0.07	0.059				0.042	0.049	0.052
	24h	0.452	0.207	0.331			24h	0.485	0.24	0.353
		0.429	0.202	0.322				0.539	0.312	0.421
		0.543	0.327	0.455				0.515	0.299	0.416
	48h	0.601	0.381	0.546			48h	0.61	0.387	0.544
		0.695	0.437	0.502				0.685	0.414	0.481
		0.648	0.482	0.569				0.682	0.453	0.592
	72h	0.826	0.518	0.701			72h	0.925	0.617	0.789
		0.9	0.617	0.753				0.895	0.612	0.737
		0.876	0.574	0.807				0.804	0.502	0.724
			0.0011684	0.0117958					0.00469615	0.0151651
