# Supplementary material for: MiRNA-205-5p Promotes Development of Hepatocellular Carcinoma Via Targeting DLC1
Source: Research Square preprint supplement (doi:10.21203/rs.3.rs-2327343/v1), 2022-12-15
Supplement: Supplementary file 17 [file EDU.xlsx]

## Sheet: Sheet1
HepG2	NC inhibitor+sh-NC	miR-205-5p inhibitor+sh-NC	miR-205-5p inhibitor+sh-DLC1				HuH-7	NC inhibitor+sh-NC	miR-205-5p inhibitor+sh-NC	miR-205-5p inhibitor+sh-DLC1
DAPI	35	31	30				DAPI	23	22	28
	39	35	34					28	20	25
	32	37	38					25	25	29
EDU	23	10	14				EDU	14	4	9
	24	8	18					15	3	7
	23	13	16					16	4	10
	65.7143	32.2581	46.6667					60.8696	18.1818	32.1429
	61.5385	22.8571	52.9412					53.5714	15	28
	71.875	35.1351	42.1053					64	16	34.4828
		0.00160216	0.0242234						0.000182428	0.00201306
