# Supplementary material for: MiRNA-205-5p Promotes Development of Hepatocellular Carcinoma Via Targeting DLC1
Source: Research Square preprint supplement (doi:10.21203/rs.3.rs-2327343/v1), 2022-12-15
Supplement: Supplementary file 18 [file .xlsx]

## Sheet: Sheet1
原始数据	NC inhibitor+sh-NC	miR-205-5p inhibitor+sh-NC	miR-205-5p inhibitor+sh-DLC1
HuH-7	5.47	24.04	14.14
	3.33	26.11	17.66
	4.56	21.41	15.98
		0.000203295	0.00952844
