# Supplementary material for: MiRNA-205-5p Promotes Development of Hepatocellular Carcinoma Via Targeting DLC1
Source: Research Square preprint supplement (doi:10.21203/rs.3.rs-2327343/v1), 2022-12-15
Supplement: Supplementary file 19 [file .xlsx]

## Sheet: Sheet1
原始数据	NC inhibitor+sh-NC	miR-205-5p inhibitor+sh-NC	miR-205-5p inhibitor+sh-DLC1
HepG2	5.17	23.28	13.72
	6.12	25.44	17.32
	4.12	22.17	15.94
		7.88933e-05	0.00497324
