# Supplementary material for: MiRNA-205-5p Promotes Development of Hepatocellular Carcinoma Via Targeting DLC1
Source: Research Square preprint supplement (doi:10.21203/rs.3.rs-2327343/v1), 2022-12-15
Supplement: Supplementary file 20 [file Ҷֵ.xlsx]

## Sheet: Sheet1
	NC inhibitor+sh-NC	miR-205-5p inhibitor+sh-NC	miR-205-5p inhibitor+sh-DLC1
Bax	42167	145161	112031		0.212684	0.765855	0.5701		1.09341	3.93726	2.93088
	38461	142163	110275		0.191021	0.723712	0.547694		0.98204	3.7206	2.8157
	36219	138564	105461		0.179839	0.687171	0.522703		0.924551	3.53275	2.68721
					0.194515
Bcl-2	135621	42154	85461		0.684053	0.2224	0.434892		1.0502	0.341443	0.667673
	130244	38964	83012		0.646873	0.198355	0.412289		0.99312	0.304527	0.632972
	125498	35416	80149		0.623137	0.175636	0.397247		0.956679	0.269648	0.609879
					0.651354
Cleaved-caspase-3	35611	142151	113204		0.179617	0.749975	0.57607		1.10148	4.59913	3.53268
	32164	140394	113369		0.159747	0.714706	0.563061		0.979626	4.38285	3.4529
	30178	135267	102317		0.149843	0.670821	0.50712		0.918896	4.11373	3.10985
					0.163069
β-actin	198261	189541	196511
	201344	196436	201344
	201397	201644	201761
