# Supplementary material for: MiRNA-205-5p Promotes Development of Hepatocellular Carcinoma Via Targeting DLC1
Source: Research Square preprint supplement (doi:10.21203/rs.3.rs-2327343/v1), 2022-12-15
Supplement: Supplementary file 21 [file Ҷֵ.xlsx]

## Sheet: Sheet1
	NC inhibitor+sh-NC	miR-205-5p inhibitor+sh-NC	miR-205-5p inhibitor+sh-DLC1
Bax	35612	130214	89121		0.243716	0.856603	0.581696		1.14102	4.0104	2.72335
	32105	125461	85411		0.205654	0.806507	0.539037		0.962818	3.77586	2.52364
	30148	122487	80135		0.191417	0.750395	0.482584		0.896166	3.51316	2.25934
					0.213596
Bcl-2	136215	45121	75244		0.932207	0.296825	0.49112		1.06549	0.339266	0.561341
	135124	42516	70123		0.865558	0.273308	0.442553		0.989316	0.312385	0.50583
	130244	40129	68451		0.826951	0.245843	0.412221		0.945189	0.280994	0.471161
					0.874905
Cleaved-caspase-3	40121	120221	80154		0.274574	0.790865	0.523168		1.15805	3.33557	2.20652
	35261	115261	78451		0.22587	0.740938	0.495112		0.952633	3.12499	2.08819
	33210	110296	77302		0.210858	0.675709	0.465523		0.88932	2.84988	1.9634
					0.237101
β-actin	146121	152012	153209
	156112	155561	158451
	157499	163230	166054
