# Supplementary material for: MiRNA-205-5p Promotes Development of Hepatocellular Carcinoma Via Targeting DLC1
Source: Research Square preprint supplement (doi:10.21203/rs.3.rs-2327343/v1), 2022-12-15
Supplement: Supplementary file 22 [file .xls]

## Sheet: Sheet1
HUH-7	NC inhibitor+sh-NC	miR-205-5p inhibitor+sh-NC	miR-205-5p inhibitor+sh-DLC1		HepG2	NC inhibitor+sh-NC	miR-205-5p inhibitor+sh-NC	miR-205-5p inhibitor+sh-DLC1
0h	2544.18	2604.01	2691.03		0h	2194.05	2193.01	2207.28
	2556.09	2733.08	2517.1			2096.02	2064.03	2196.03
	2679.11	2655.55	2431.62			2091.05	2123	2106.03
48h	651.028	1563.05	805.259		48h	434.012	1264.65	936.043
	636.113	1530.36	909.005			506.706	1354.61	825.015
	432.666	1380.15	927.393			623.298	1207.35	976.021
	1893.15	1040.96	1885.77			1760.04	928.353	1271.24
	1919.97	1202.73	1608.09			1589.31	709.419	1371.01
	2246.44	1275.4	1504.22			1467.76	915.652	1130.01
	74.4111	39.9753	70.0762			80.2187	42.3324	57.5929
	75.1138	44.0062	63.8868			75.8253	34.3707	62.4314
	83.8504	48.0278	61.8611			70.1922	43.1301	53.656
		0.000905423	0.00330187				0.000919408	0.00894971
