# Supplementary material for: MiRNA-205-5p Promotes Development of Hepatocellular Carcinoma Via Targeting DLC1
Source: Research Square preprint supplement (doi:10.21203/rs.3.rs-2327343/v1), 2022-12-15
Supplement: Supplementary file 23 [file transwell.xlsx]

## Sheet: Sheet1
原始数据	NC inhibitor+sh-NC	miR-205-5p inhibitor+sh-NC	miR-205-5p inhibitor+sh-DLC1
HepG2	174	41	98
	163	52	87
	151	59	79
HuU-7	129	36	84
	138	44	97
	147	53	73
HepG2		0.00018803	0.00797771
HuU-7		0.000195957	0.00899728
