# Supplementary material for: MiRNA-205-5p Promotes Development of Hepatocellular Carcinoma Via Targeting DLC1
Source: Research Square preprint supplement (doi:10.21203/rs.3.rs-2327343/v1), 2022-12-15
Supplement: Supplementary file 24 [file transwell.xlsx]

## Sheet: Sheet1
原始数据	NC inhibitor+sh-NC	miR-205-5p inhibitor+sh-NC	miR-205-5p inhibitor+sh-DLC1
HepG2	132	31	95
	147	44	83
	155	58	71
HuU-7	106	33	62
	115	47	77
	126	52	85
HepG2		0.000623522	0.0207014
HuU-7		0.000905403	0.0254149
