# Supplementary figures and images for: MiRNA-205-5p Promotes Development of Hepatocellular Carcinoma Via Targeting DLC1
Source: Research Square preprint supplement (doi:10.21203/rs.3.rs-2327343/v1), 2022-12-15

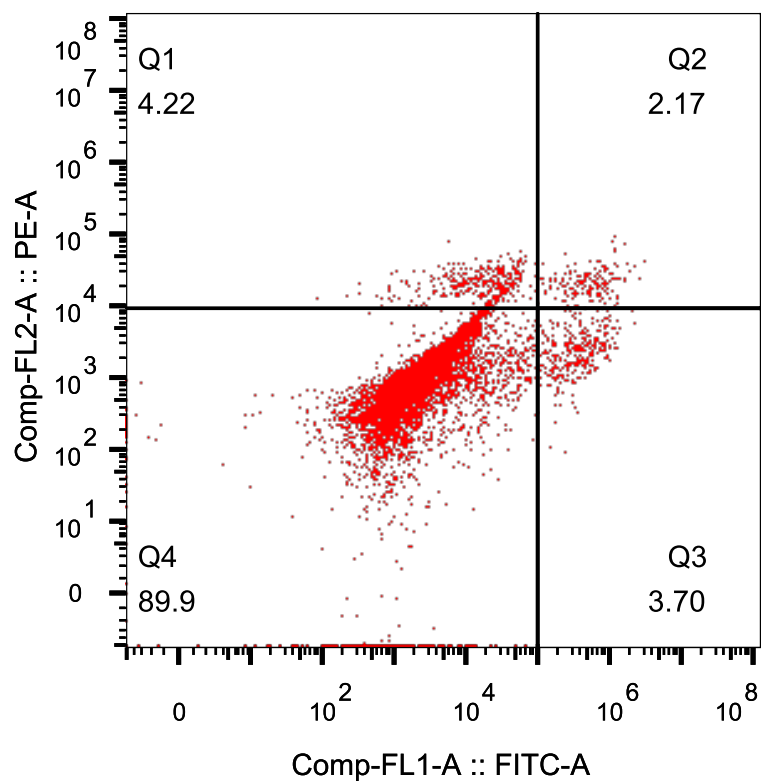

2-6.fcs  
Lymphocytes  
59685

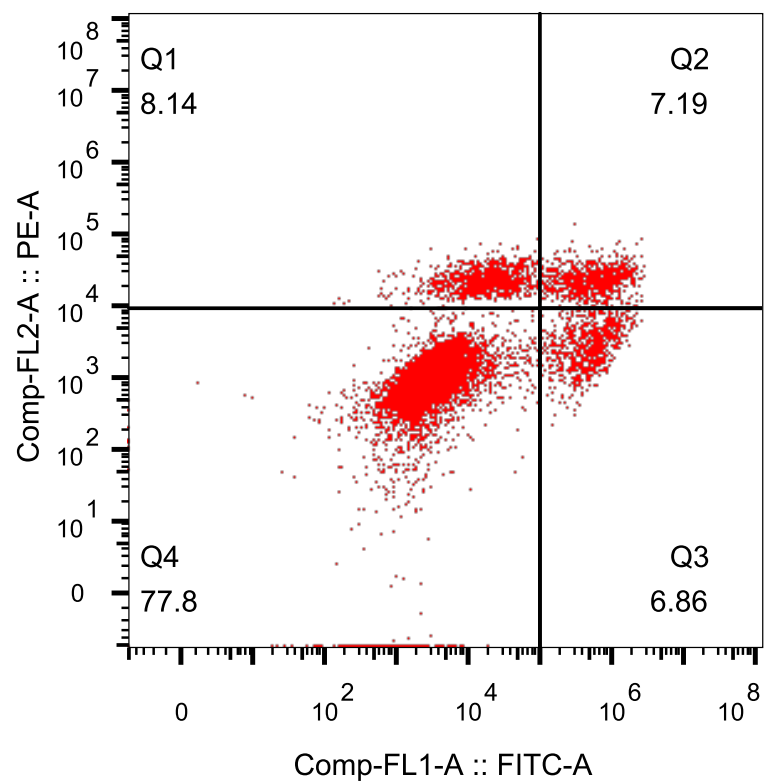

2-3.fcs  
Lymphocytes  
12487

Supplement: Supplementary file 1 [file NC inhibitor.pdf › original data/Figures/Figures2/C/HUH-7/NC inhibitor.pdf]

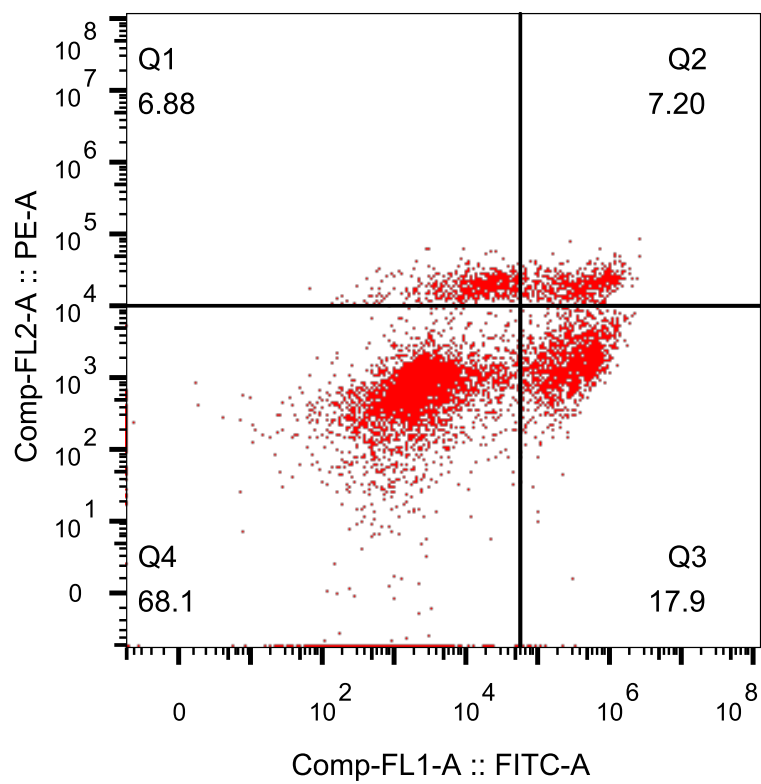

2-3.fcs  
Lymphocytes  
8463

Supplement: Supplementary file 2 [file miR-205-5p inhibitor.pdf › original data/Figures/Figures2/C/HUH-7/miR-205-5p inhibitor.pdf]

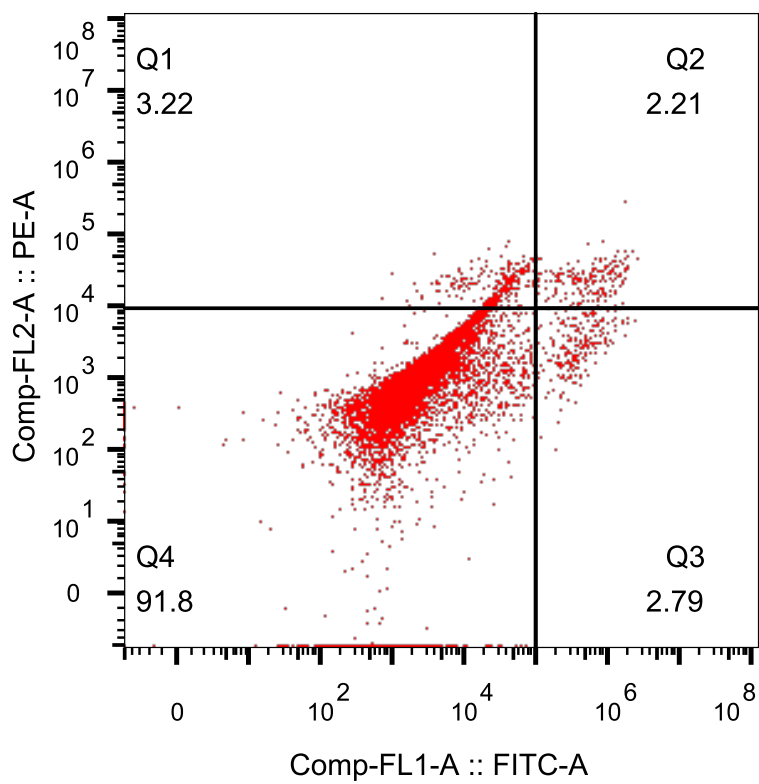

1-6.fcs  
Lymphocytes  
86518

Supplement: Supplementary file 3 [file NC inhibitor.pdf › original data/Figures/Figures2/C/HepG2/NC inhibitor.pdf]

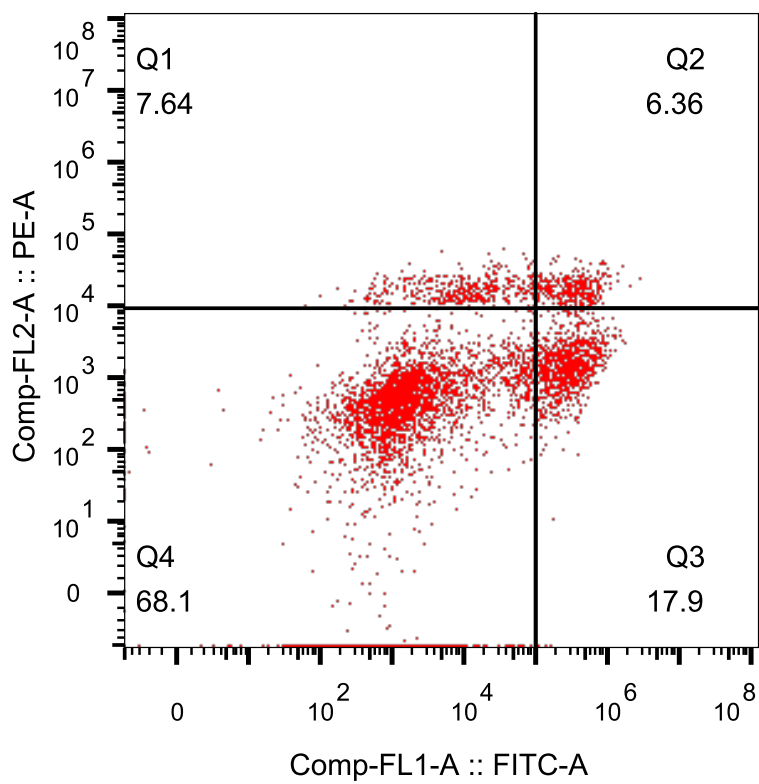

2-4.fcs  
Lymphocytes  
5222

Supplement: Supplementary file 4 [file miR-205-5p inhibitor.pdf › original data/Figures/Figures2/C/HepG2/miR-205-5p inhibitor.pdf]

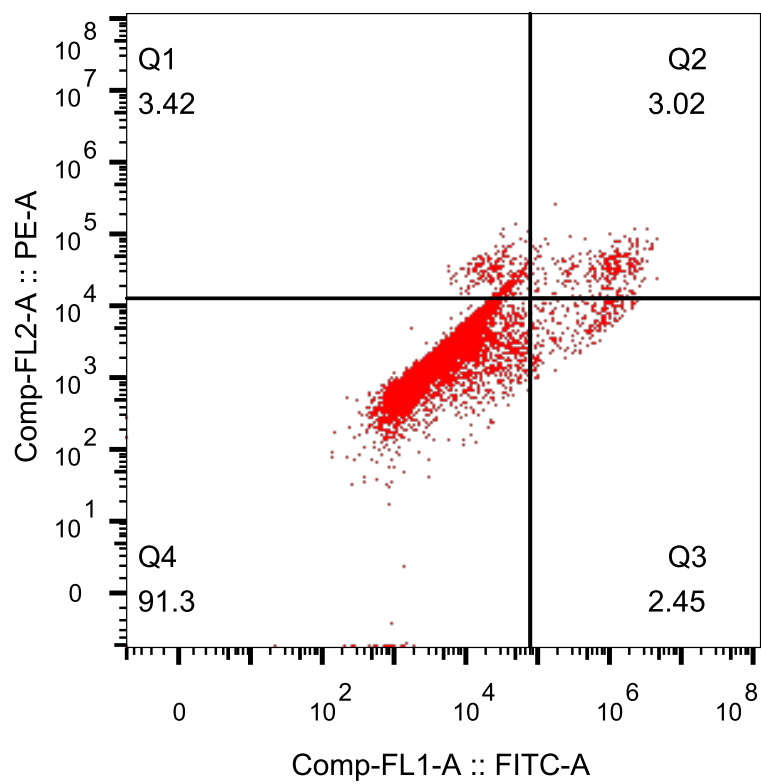

2-5.fcs  
Lymphocytes  
20879

Supplement: Supplementary file 5 [file NC inhibitor+sh-NC.pdf › original data/Figures/Figures5/C/HUH-7/NC inhibitor+sh-NC.pdf]

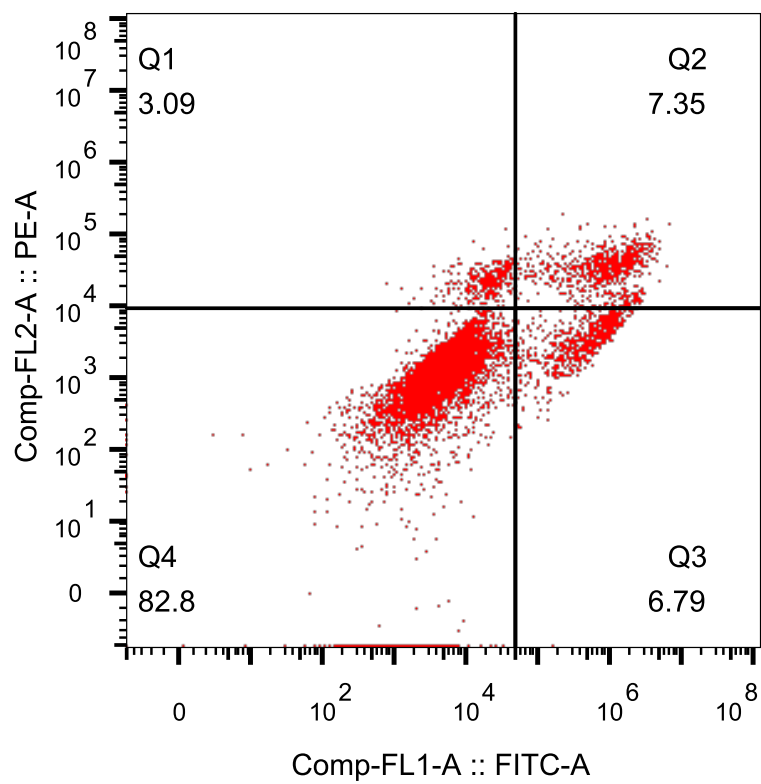

1-2.fcs  
Lymphocytes  
10987

Supplement: Supplementary file 6 [file miR-205-5p inhibitor+sh-DLC1.pdf › original data/Figures/Figures5/C/HUH-7/miR-205-5p inhibitor+sh-DLC1.pdf]

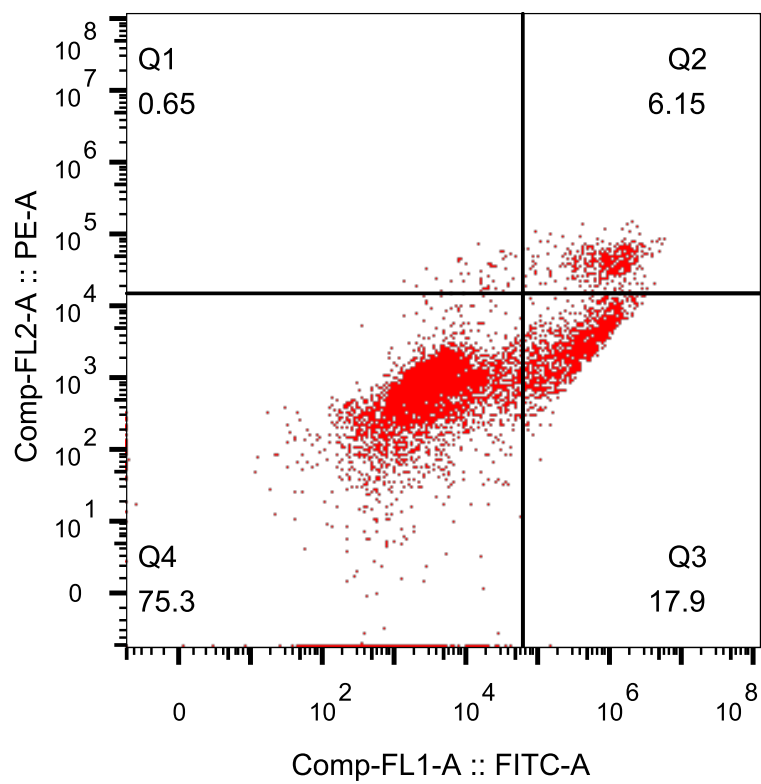

2-1.fcs  
Lymphocytes  
6963

Supplement: Supplementary file 7 [file miR-205-5p inhibitor+sh-NC.pdf › original data/Figures/Figures5/C/HUH-7/miR-205-5p inhibitor+sh-NC.pdf]

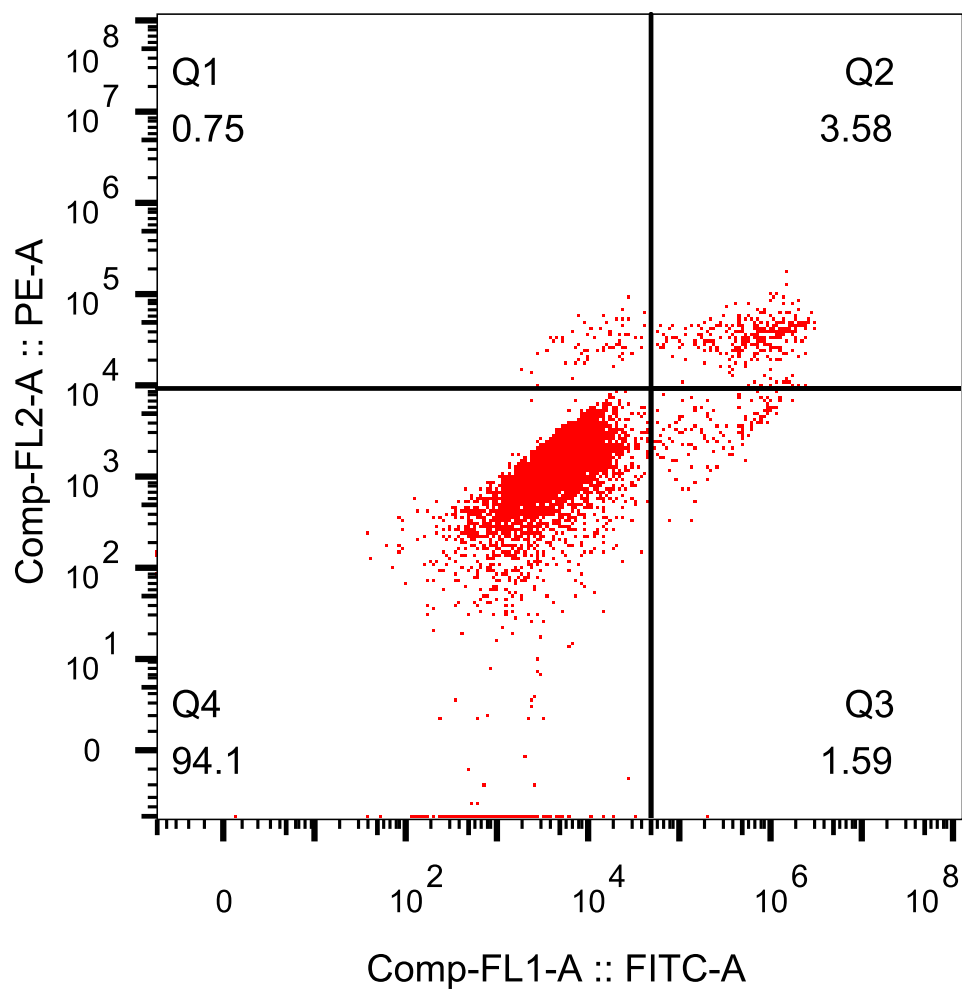

2-2.fcs  
Lymphocytes  
9033

Supplement: Supplementary file 8 [file NC inhibitor+sh-NC.pdf › original data/Figures/Figures5/C/HepG2/NC inhibitor+sh-NC.pdf]

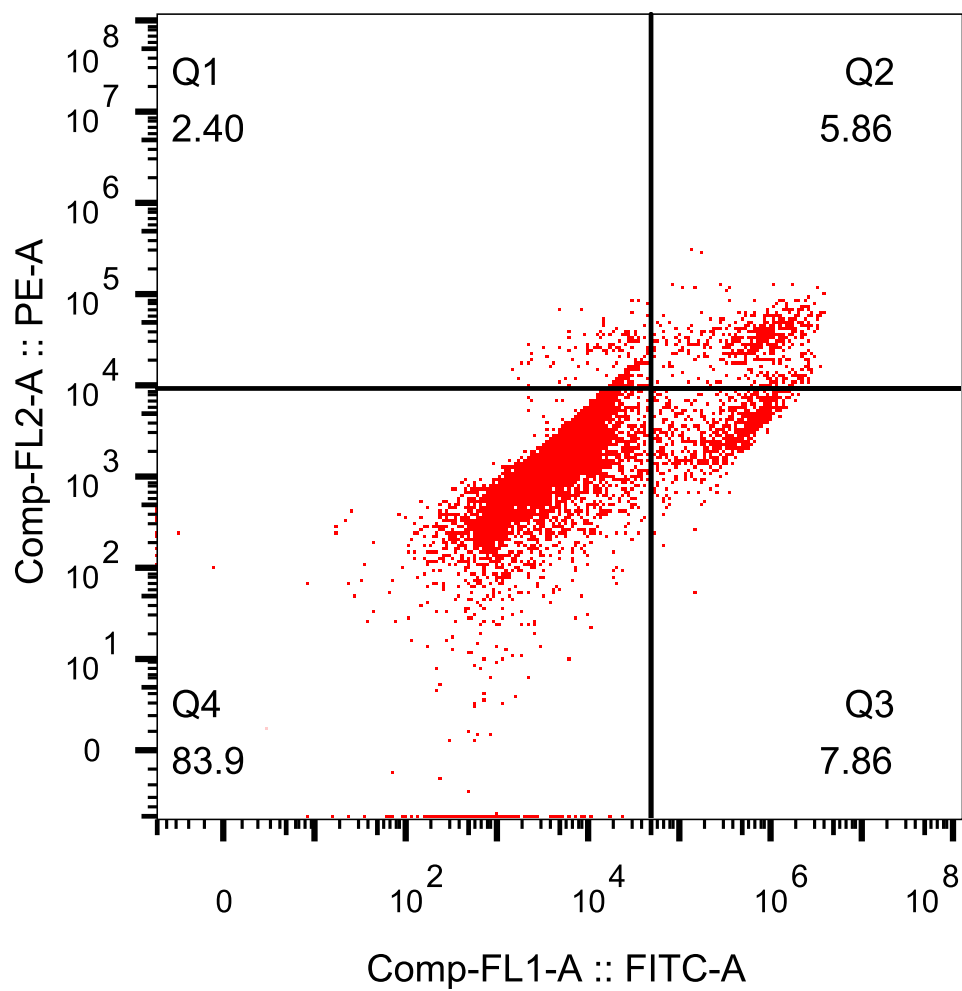

1-4.fcs  
Lymphocytes  
19869

Supplement: Supplementary file 9 [file miR-205-5p inhibitor+sh-DLC1.pdf › original data/Figures/Figures5/C/HepG2/miR-205-5p inhibitor+sh-DLC1.pdf]

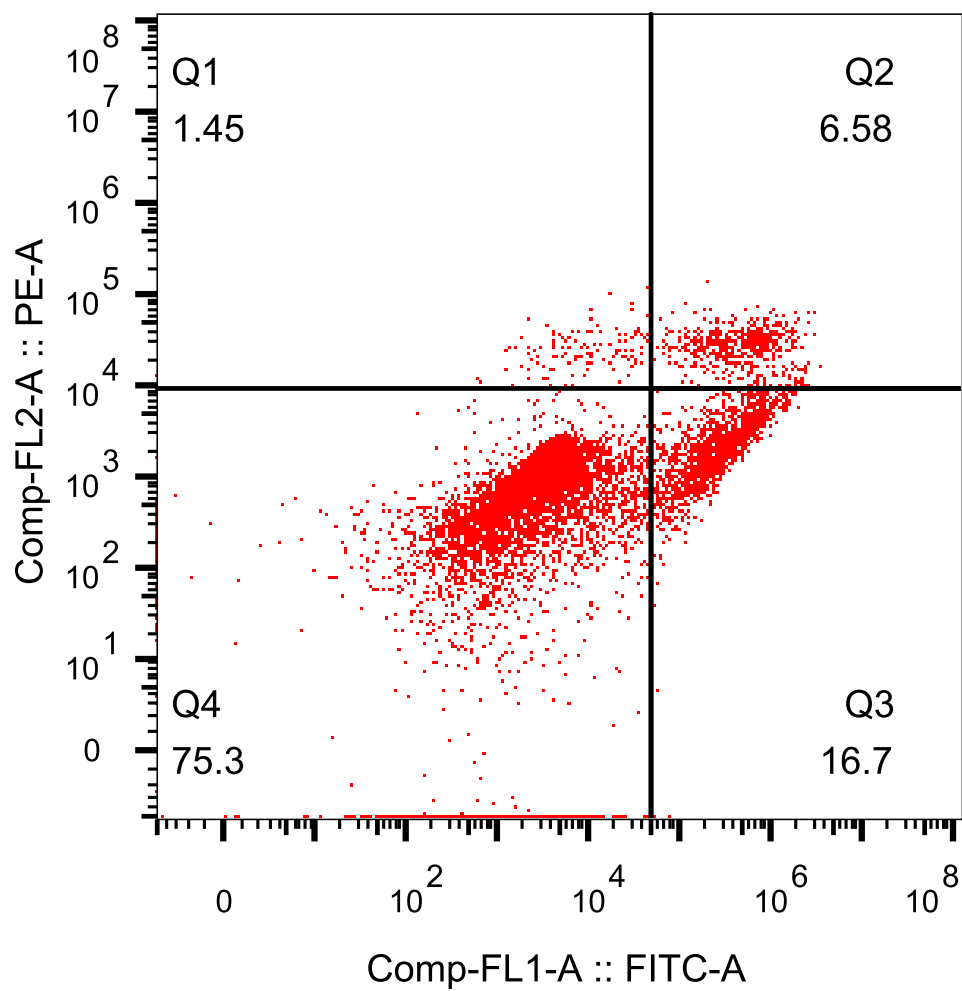

1-5.fcs  
Lymphocytes  
8574

Supplement: Supplementary file 10 [file miR-205-5p inhibitor+sh-NC.pdf › original data/Figures/Figures5/C/HepG2/miR-205-5p inhibitor+sh-NC.pdf]
